# Supplementary material for: Structural understanding of solid-state photodimerization reactions of cinnamic amide derivatives in terms of reaction cavities – color developer for thermosensitive paper
Source: Royal Society of Chemistry journal article supplement (doi:10.1039/c3ce40130h), 2013-01-01
Supplement: c3ce40130h.pdf [file c3ce40130h.pdf]

## Supplementary Information Document

### Structural understanding of solid-state photodimerization reactions of cinnamic amide derivatives in terms of reaction cavities – color developer for thermosensitive paper

Satoshi Kodama, Kohei Johmoto, Akiko Sekine, Kotaro Fujii and Hidehiro Uekusa\*

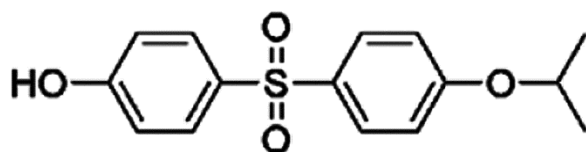

**Scheme S1.** Molecular structure of the conventional developer **5** (4-isopropoxy-4'-hydroxydiphenyl sulfon)

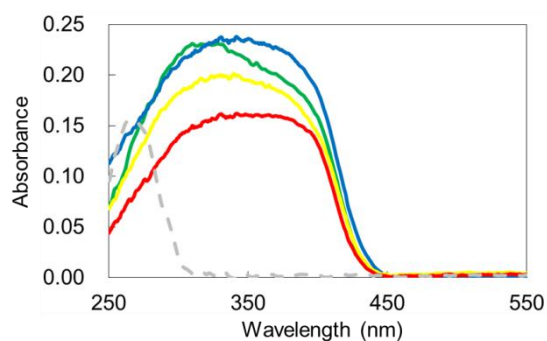

**Figure S1.** UV/vis spectra of developer **1** (red), **2** (green), **3** (blue), **4** (yellow) and **5** (gray) in the solid state.

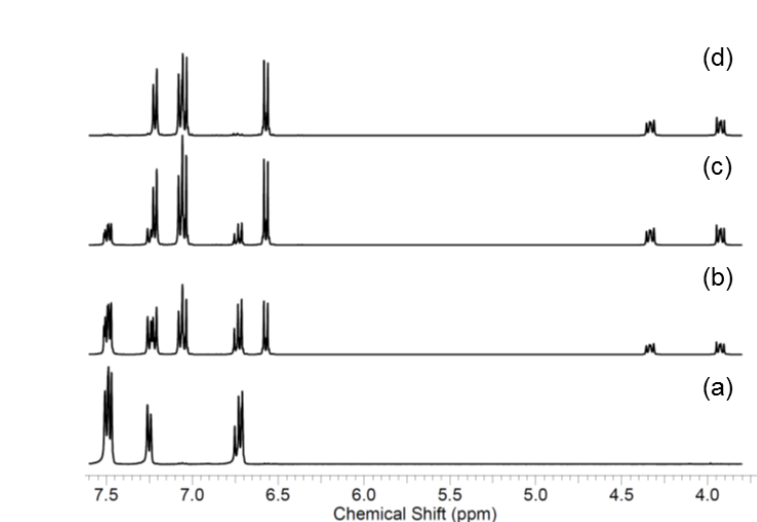

**Figure S2.**  $^1\text{H}$  NMR spectra of **1** in DMSO- $d_6$ : (a) before photo-irradiation, (b) after photo-irradiation for 1 hour, (c) after photo-irradiation for 2 hours, (d) after irradiation for 5 hours.

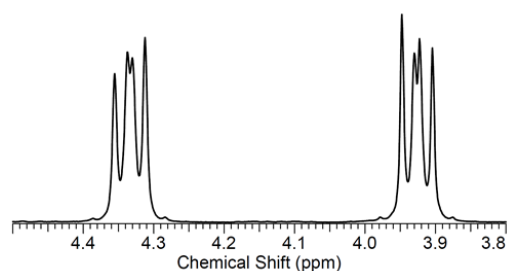

**Figure S3.**  $^1\text{H}$  NMR spectra of **1** after photo-irradiation for 5 hours in DMSO- $d_6$ .

| Compound | $\theta_1$ | $\theta_2$ | $\theta_3$ |
|----------|------------|------------|------------|
| <b>1</b> | 0.0        | 101.1      | 65.1       |
| <b>2</b> | 0.0        | 127.1      | 74.6       |
| <b>3</b> | 0.0        | 126.9      | 81.0       |

**Table S1.** Overlap parameters for the alignment of the adjacent olefinic double bonds (See REF 25 and 31 for the definition of the overlap parameters).
